# Supplementary material for: An iron(ii) hydride complex of a ligand with two adjacent β-diketiminate binding sites and its reactivity
Source: Royal Society of Chemistry journal article supplement (doi:10.1039/c5dt04266f), 2016-01-01
Supplement: c5dt04266f1.pdf [file c5dt04266f1.pdf]

Supporting Information  
for

**Iron(II) Hydride Complex of a Ligand with two Adjacent  $\beta$ -Diketimate  
Binding sites and its Reactivity**

Henrike Gehring, Ramona Metzinger, Beatrice Braun, Christian Herwig, Sjoerd Harder, Kallol Ray and Christian Limberg<sup>\*,a</sup>

*\*To whom correspondence should be addressed: christian.limberg@chemie.hu-berlin.de*

*<sup>a</sup>Institut für Chemie, Humboldt-Universität zu Berlin, Brook-Taylor-Str. 2, 12489 Berlin, Germany*

**Table of Contents**

|                                               |    |
|-----------------------------------------------|----|
| 1. Experimental Procedure.....                | 2  |
| 2. <sup>1</sup> H NMR Spectroscopic Data..... | 2  |
| 3. Mößbauer Data .....                        | 4  |
| 4. Crystallographic Data .....                | 5  |
| 5. XAS .....                                  | 7  |
| 6. Density Functional Calculations.....       | 9  |
| 7. References .....                           | 19 |

## 1. Experimental Procedure

**[[PYR]<sub>2</sub>Fe<sub>4</sub>(μ-O)(μ-H)<sub>2</sub>] (3).** Slow evaporation of the volatiles from a benzene-*d*<sub>6</sub> solution of **2** (presumably containing traces of water) led to the formation of dark brown crystals of **3**. IR (KBr):  $\tilde{\nu}$  = 3056 (w), 2961 (s), 2925 (m), 2866 (m), 1640 (w), 1579 (m), 1521 (s), 1458 (s), 1430 (s), 1405 (s), 1374 (vs), 1356 (vs), 1321 (s), 1266 (s), 1223 (s), 1183 (s), 1152 (s), 1099 (m), 1055 (m), 1018 (s), 935 (m), 836 (m), 825 (m), 795 (m), 759 (s), 729 (w), 707 (w), 627 (m) cm<sup>-1</sup>; elemental analysis calcd (%) for C<sub>78</sub>H<sub>104</sub>N<sub>10</sub>OFe<sub>4</sub> (1421.14 gmol<sup>-1</sup>): C 65.92, H 7.38, N 9.86; found (%): C 64.90, H 7.09, N 9.01.

**[[PYR]Fe<sub>2</sub>(μ-CH<sub>3</sub>COO)<sub>2</sub>] (5').** [[PYR]Fe<sub>2</sub>(μ-Br)<sub>2</sub>] (**1**) (80.0 mg, 93 μmol) was stirred together with potassium acetate (18 mg, 186 μmol) in tetrahydrofuran for 16 h at room temperature. The reaction mixture was filtered and the solvent was removed under reduced pressure. Extraction of the residue with *n*-hexane and cooling to -30 °C afforded **5'** as red crystals (27 mg, 33 μmol, 36%). <sup>1</sup>H NMR (400 MHz, C<sub>6</sub>D<sub>6</sub>):  $\delta$  = 71.68 (6H, CH<sub>3</sub>COO), 26.27 (1H, CH<sub>4</sub>-pyr), 19.68 (4H, CH<sub>Ar</sub>), 5.45 (12H, CH(CH<sub>3</sub>)<sub>2</sub>), -3.36 (12H, CH(CH<sub>3</sub>)<sub>2</sub>), -4.23(4H, CH(CH<sub>3</sub>)<sub>2</sub>), -25.93 (2H, CH<sub>Ar</sub>), -44.56 (6H, CH<sub>3</sub>), -45.03 (6H, CH<sub>3</sub>) ppm; IR (KBr):  $\tilde{\nu}$  = 3057 (w), 2960 (s), 2927 (m), 2867 (m), 1637 (m), 1599 (s), 1570 (s), 1555 (s), 1513 (s), 1437 (vs), 1406 (vs), 1392 (vs), 1381 (vs), 1356 (vs), 1322 (s), 1274 (s), 1225 (s), 1183 (m), 1161 (m), 1056 (w), 1021 (m), 935 (w), 787 (m), 760 (m), 734 (w), 706 (w), 654 (w), 624 (w)cm<sup>-1</sup>; elemental analysis calcd (%) for C<sub>43</sub>H<sub>57</sub>N<sub>5</sub>O<sub>4</sub>Fe<sub>2</sub> (819.65 gmol<sup>-1</sup>): C 63.01, H 7.01, N 8.54; found (%): C 63.00, H 7.27, N 8.10.

## 2. <sup>1</sup>H NMR Spectroscopic Data

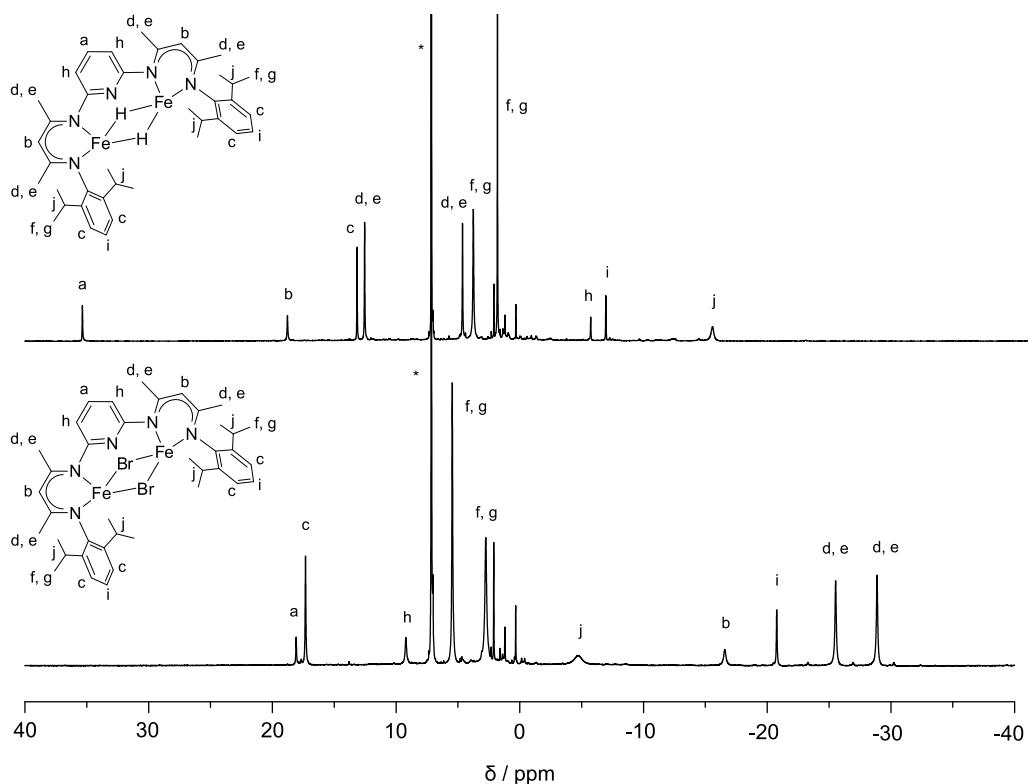

**Fig. S1** <sup>1</sup>H NMR spectra of [(PYR)Fe<sub>2</sub>(μ-Br)<sub>2</sub>] (**1**) (bottom) and [(PYR)Fe<sub>2</sub>(μ-H)<sub>2</sub>] (**2**) (top), measured for C<sub>6</sub>D<sub>6</sub> solutions (\*). In case of the CH<sub>3</sub> groups belonging to the *i*Pr residues only two representatives are labelled.

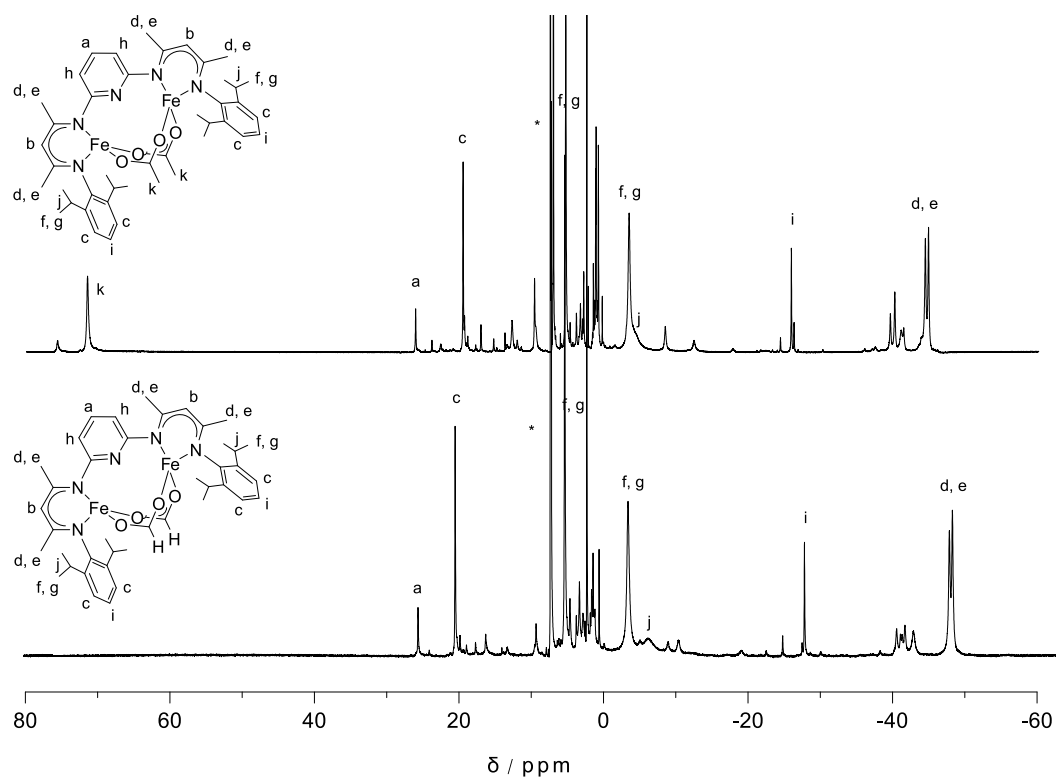

**Fig. S2**  $^1\text{H}$  NMR spectra of  $[(\text{Pyr})\text{Fe}_2(\mu\text{-HCOO})_2]$  (**5**) (bottom) and  $[(\text{Pyr})\text{Fe}_2(\mu\text{-CH}_3\text{COO})_2]$  (**5'**) (top), measured for  $\text{C}_6\text{D}_6$  solutions (\*). In case of the  $\text{CH}_3$  groups belonging to the *iPr* residues only two representatives are labelled.

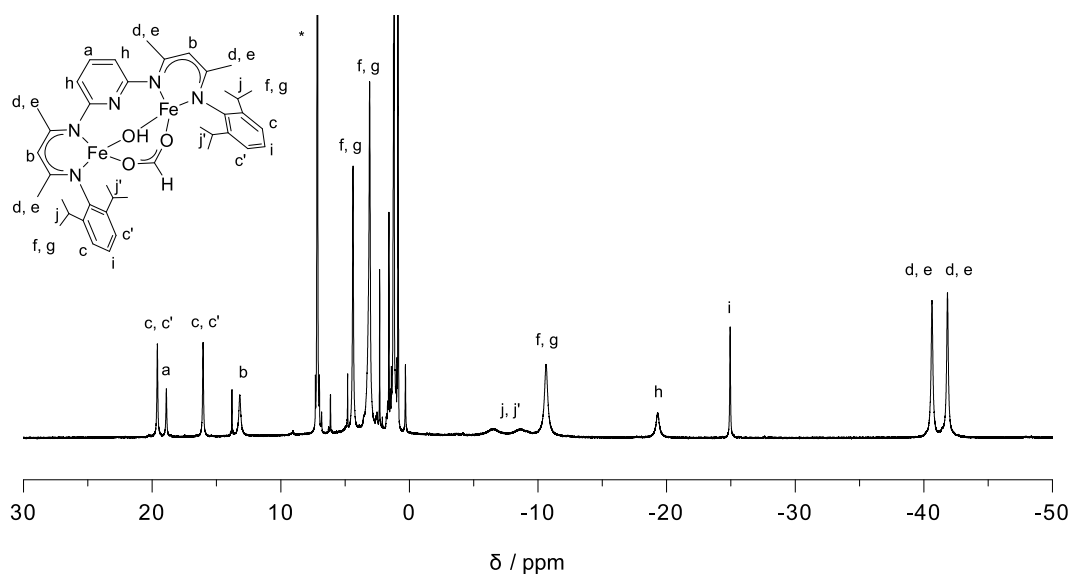

**Fig. S3**  $^1\text{H}$  NMR spectrum of  $[(\text{Pyr})\text{Fe}_2(\mu\text{-HCOO})(\mu\text{-OH})]$  (**6**) measured for  $\text{C}_6\text{D}_6$  solutions (\*). In case of the  $\text{CH}_3$  groups belonging to the *iPr* residues only two representatives are labelled.

### 3. Mößbauer Data

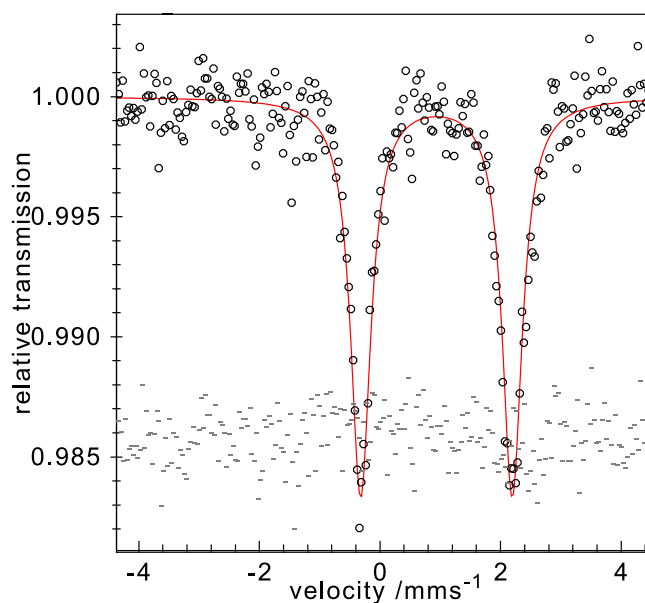

**Fig. S4** Mößbauer spectrum of solid  $[(\text{PYR})\text{Fe}_2(\mu\text{-Br})_2]$  (**1**) at 80 K. The simulation shows one doublet for **1** with an isomeric shift of  $\delta = 0.94 \text{ mms}^{-1}$  and a quadrupole splitting of  $\Delta E_Q = 2.51 \text{ mms}^{-1}$  (representing 100% of the total iron).

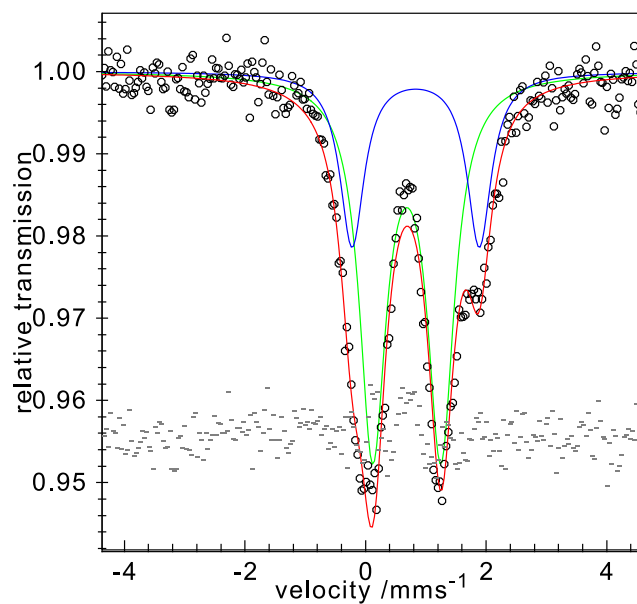

**Fig. S5** Mößbauer spectrum of solid  $[(\text{PYR})\text{Fe}_2(\mu\text{-H})_2]$  (**2**) at 80 K. The simulation shows one doublet for **2** with an isomeric shift of  $\delta = 0.68 \text{ mms}^{-1}$  and a quadrupole splitting of  $\Delta E_Q = 1.13 \text{ mms}^{-1}$  (representing 70% of the total iron) and a second doublet for another species with an isomeric shift of  $\delta = 0.83 \text{ mms}^{-1}$  and a quadrupole splitting of  $\Delta E_Q = 2.11 \text{ mms}^{-1}$  (30% of the total iron).

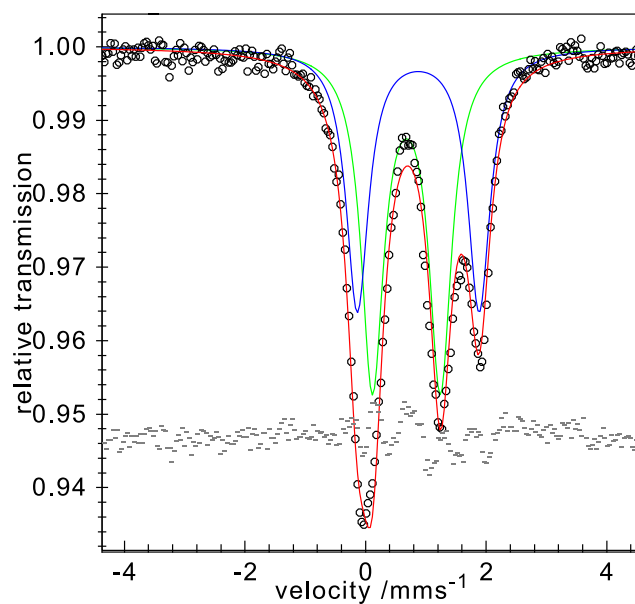

**Fig. S6** Mössbauer spectrum of solid  $[(\text{Pyr})\text{Fe}_2(\mu\text{-H})_2]$  (**2**) at 80 K. The simulation shows one doublet for **2** with an isomeric shift of  $\delta = 0.68 \text{ mms}^{-1}$  and a quadrupole splitting of  $\Delta E_Q = 1.13 \text{ mms}^{-1}$  (representing 56% of the total iron) and one second doublet for another species (44% of the total iron) with an isomeric shift of  $\delta = 0.87 \text{ mms}^{-1}$  and a quadrupole splitting of  $\Delta E_Q = 2.02 \text{ mms}^{-1}$ .

#### 4. Crystallographic Data

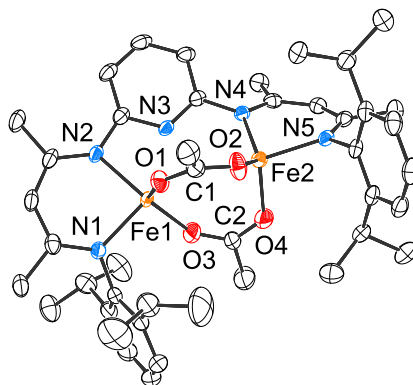

**Fig. S7** Molecular structure of  $[(\text{Pyr})\text{Fe}_2(\mu\text{-CH}_3\text{COO})_2]$  (**5'**); ellipsoids are set at 50% probability. Hydrogen atoms have been omitted for clarity. Selected bond lengths /Å and angles /°: Fe1-N1 2.056(2), Fe1-N2 2.030(2), Fe1-O1 2.0674(19), Fe1-O3 1.980(2), Fe2-N4 2.002(2), Fe2-N5 2.028(2), Fe2-O2 1.9577(19), Fe2-O4 2.031(2), C1-O1 1.250(3), C1-O2 1.257(3), C2-O3 1.247(3), C2-O4 1.246(3), Fe1-Fe2 3.4741(7), N1-Fe1-N2 88.86(8), O1-Fe1-N1 103.22(8), O1-Fe1-N2 97.37(8), O1-Fe1-O3 120.88(8), N1-Fe1-O3 97.78(8), N2-Fe1-O3 137.97(9), Fe1-O1-C1 137.24(19), Fe1-O3-C2 143.1(2), O1-C1-O2 125.0(3), O3-C2-O4 124.9(3), Fe2-O2-C1 130.69(17), Fe2-O4-C2 127.22(19), N4-Fe2-N5 93.93(8), O2-Fe2-N4 128.80(9), O2-Fe2-N5 105.23(8), O2-Fe2-O4 114.99(10), O4-Fe2-N4 105.66(9), O4-Fe2-N5 103.13(8).

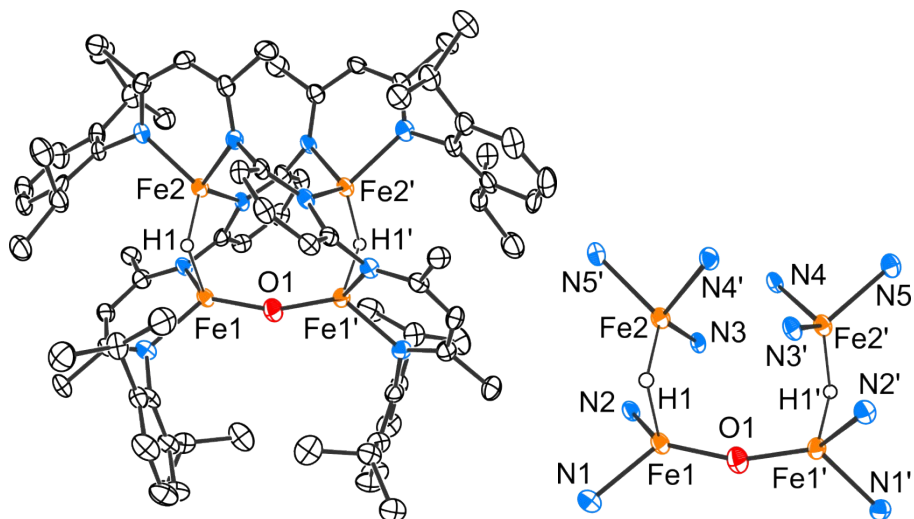

**Fig. S8** Molecular structure of  $[(\text{Pyr})_2\text{Fe}_4(\mu\text{-O})(\mu\text{-H})_2]$  (**3**) (left) and the truncated core (right); ellipsoids are set at 50% probability. Hydrogen atoms beside the bridging hydride ligands have been omitted for clarity. Selected bond lengths /Å and angles /°: Fe1–N1 2.003(4), Fe1–N2 2.051(3), Fe1–H1 1.75(5), Fe1–O1 1.7756(12), Fe2–N3 2.124(4), Fe2–N4' 2.027(3), Fe2–N5' 2.060(4), Fe2–H1 1.66(5), Fe1...Fe2 2.7922(10), Fe1...Fe1' 3.4988(13), Fe2...Fe2' 3.6658(13), Fe1–H1–Fe2 110(2), Fe1–O1–Fe1' 160.3(3), N1–Fe1–N2 92.88(15), H1–Fe1–N2 100.8(14), H1–Fe1–O1 101.8(15), N1–Fe1–O1 127.3(2), H1–Fe2–N5' 122.9(16), N4'–Fe2–N5' 90.43(15), N3–Fe2–N4' 118.26(15), H1–Fe2–N3 110.9(16).

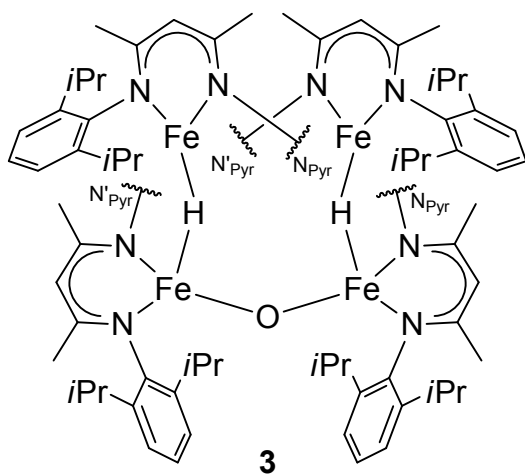

Compound **3** crystallizes in a monoclinic space group ( $C_2/c$ ) with four molecules in the asymmetric unit cell. One half of each molecule is generated by symmetry operation ( $C_2$ ). All iron centers in **3** are surrounded by their ligands in a tetrahedral geometry. Fe2 is coordinated by three nitrogen atoms, two of the  $\beta$ -diketimate binding pocket (N4' and N5') and one of the pyridine ring (N3). Additionally, Fe2 is bridged by one hydride ligand to Fe1. Fe1 is further coordinated by the two nitrogen atoms of one  $\beta$ -diketimate binding pocket (N1 and N2) and by one bridging oxo ligand. The hydride ligands could be located from the

electron density difference map. The Fe–H distances (1.75(5) Å and 1.66(5) Å) are slightly longer compared to the Fe–H distances in  $\beta$ -diketimate iron(II) hydride complexes (**1**; 1.40 – 1.56 Å),<sup>1</sup> but still in the range of Fe–H bond lengths found for other dinuclear iron hydride compounds (1.51 – 1.94 Å).<sup>2</sup> The Fe–H–Fe angle amounts to 110(2)°. The Fe1...Fe2 distance is 2.7922(19) Å, which is much shorter compared to the corresponding value of the precursor compound **1** (3.0332(7) Å). Regarding the Fe1–O1 distance of 1.7756(12) Å and the almost linear Fe1–O1–Fe1' angle of 160.3(3)° the possibility of a hydroxo bridge can be excluded: For instance, Fe–O distances of 1.95 – 2.08 Å are reported for  $\mu$ -hydroxo diiron complexes.<sup>3</sup> Furthermore the observed values for **3** fit very well to the metric data reported by Holland and coworkers for the only known structurally characterized  $\text{Fe}^{\text{II}}(\mu\text{-O})\text{Fe}^{\text{II}}$  moiety (Fe–O 1.7503(4) Å; Fe–O–Fe 167.55(14)°).<sup>4</sup>

## 5. XAS

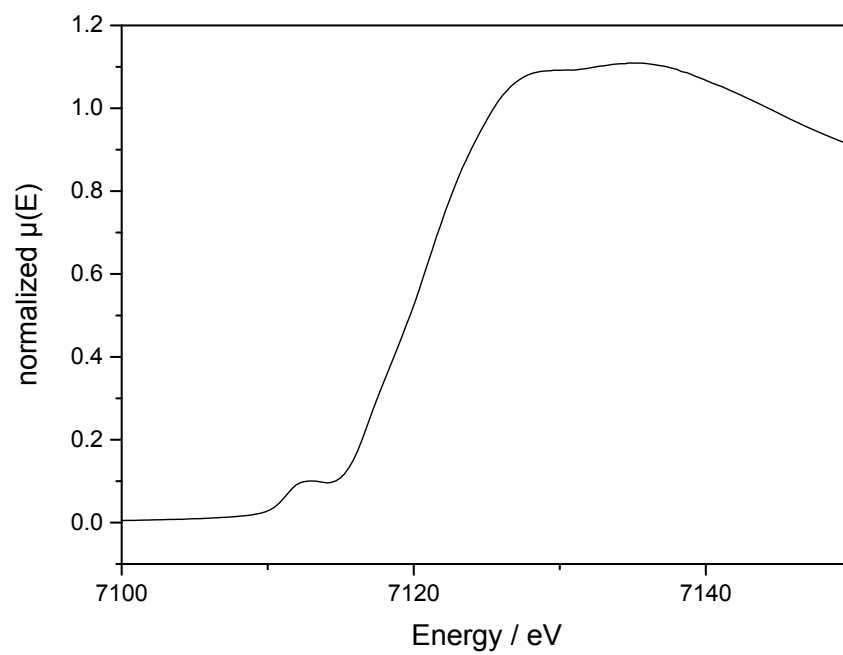

**Fig. S9** XANES spectrum of complex 2.

Sample  
2 vs DFT

|          |              |              |              |                | Fe-N     |             |            | Fe-Fe    |             |            | Fe••C    |             |             | Fe••C    |             |             | Fe••N    |             |            | Fe•••C   |             |             |
|----------|--------------|--------------|--------------|----------------|----------|-------------|------------|----------|-------------|------------|----------|-------------|-------------|----------|-------------|-------------|----------|-------------|------------|----------|-------------|-------------|
| fit      | R-factor     | red. Chi-sq. | $\Delta E_0$ | R range        | n        | r           | $\sigma^2$ | n        | r           | $\sigma^2$ | n        | r           | $\sigma^2$  | n        | r           | $\sigma^2$  | n        | r           | $\sigma^2$ | n        | r           | $\sigma^2$  |
| 1        | 0.194        | 802.78       | 3.227        | 1 - 2.5        | 2        | 2.03        | 1.0        |          |             |            |          |             |             |          |             |             |          |             |            |          |             |             |
| 2        | 0.036        | 218.83       | 1.960        | 1 - 2.5        | 2        | 2.02        | 0.8        | 1        | 2.54        | 7.6        |          |             |             |          |             |             |          |             |            |          |             |             |
| 3        | 0.004        | 27.13        | 1.748        | 1 - 2.5        | 3        | 2.03        | 3.3        | 1        | 2.54        | 8.1        |          |             |             |          |             |             |          |             |            |          |             |             |
| 4        | 0.033        | 45.46        | 1.720        | 1 - 5.0        | 3        | 2.03        | 3.3        | 1        | 2.54        | 8.2        |          |             |             |          |             |             |          |             |            |          |             |             |
| 5        | 0.031        | 47.51        | 2.195        | 1 - 5.0        | 3        | 2.03        | 3.3        | 1        | 2.55        | 8.3        | 4        | 3.08        | 47.7        |          |             |             |          |             |            |          |             |             |
| 6        | 0.018        | 31.42        | 2.009        | 1 - 5.0        | 3        | 2.03        | 3.3        | 1        | 2.54        | 8.2        | 4        | 4.60        | 3.4         | 9        | 3.92        | 72.7        |          |             |            |          |             |             |
| 7        | 0.018        | 35.01        | 1.340        | 1 - 5.0        | 3        | 2.02        | 3.3        | 1        | 2.54        | 8.2        | 4        | 3.34        | 13.6        | 9        | 3.73        | 27.9        | 2        | 4.57        | 0.9        |          |             |             |
| <b>8</b> | <b>0.017</b> | <b>37.52</b> | <b>2.167</b> | <b>1 - 5.0</b> | <b>3</b> | <b>2.03</b> | <b>3.3</b> | <b>1</b> | <b>2.55</b> | <b>8.2</b> | <b>4</b> | <b>3.07</b> | <b>79.8</b> | <b>9</b> | <b>3.92</b> | <b>48.0</b> | <b>2</b> | <b>4.58</b> | <b>1.0</b> | <b>9</b> | <b>5.19</b> | <b>24.8</b> |
| DFT      |              |              |              |                | 3        | 2.19        |            | 1        | 2.61        |            | 4        | 2.95        |             | 9        | 3.88        |             | 2        | 4.53        |            | 9        | 4.86        |             |

**Table S1** Summary of EXAFS fitting for **2**. Bold line represents the best fit for the system (fit 8), r is in units of Å;  $\sigma^2$  is in units of  $10^{-3}$  Å;  $\Delta E_0$  is in units of eV; R represents the goodness of the fit (GOF) and is defined by  $R = \frac{1}{N} \sum_i \left[ \frac{|\chi_{dat}(R_i) - \chi_{th}(R_i)|}{\chi_{dat}(R_i)} \right]$  (value from ifeffit package); reduced chi-square is a second GOF-factor defined by  $\chi^2_{\vartheta} = \chi^2 / (N - N_{vars})$  and  $\chi^2 = \frac{1}{\epsilon^2 N} \sum_i \left[ \frac{(\chi_{dat}(R_i) - \chi_{th}(R_i))^2}{\chi_{th}^2(R_i)} \right]$ . Fourier transform range: 2 - 12 Å<sup>-1</sup>. The fit was optimized in R space with a k-weight of 3. The fitting range is 1.0-2.5 and 1.0-5.0 for fits 1-3 and 4-8, respectively.



## 6. Density Functional Calculations

Geometry optimizations were performed in redundant internal coordinates without symmetry restrictions for different spin states of  $[\text{Pyr})\text{Fe}_2(\mu\text{-H})_2]$  (**2**) using the Gaussian09 program package.<sup>[5]</sup> The molecular structure of  $[(\text{Pyr})\text{Fe}_2(\mu\text{-Br})_2]$  (**1**) as determined by X-ray diffraction analysis, with the bromide ligand substituted by hydrido ligands, was used as starting geometry. The B3LYP functional<sup>[6]</sup> was employed together with def2 basis sets, taken from the EMSL Basis Set Exchange Database<sup>[7]</sup>: the def2-TZVPD basis set<sup>[8]</sup> was used for Fe, N, and the two bridging hydride ligands H1 and H2. For all remaining C and H atoms, the def2-SVP basis set<sup>[9]</sup> was employed. Very tight convergence criteria were chosen for the SCF procedure and a pruned (99,590) “ultrafine” integration grid was used for numerical integrations. Visualisation of molecular structures was accomplished with the program Gauss View (Gaussian, Inc.).

An open-shell singlet state, where four unpaired electrons per iron center couple antiferromagnetically, was found to represent the ground state. The corresponding nonet state with a ferromagnetic coupling of the 2x4 unpaired electrons is 19.9 kJ/mol higher in energy. In contrast to the structure of **1** there is no  $C_2$  axis in the structure of **2**. To simulate the effect of the solvent Toluene, for all spin states a reoptimisation has been done employing the Polarizable Continuum Model (PCM) as implemented in Gaussian, resulting in minor structural changes (table S2, S3).

| spin state             | Mulliken atomic spin density | rel. energy (kJ/mol) | rel. energy (kJ/mol) in Toluene |
|------------------------|------------------------------|----------------------|---------------------------------|
| singlet (closed shell) | 0                            | 228.5                | 230.6                           |
| triplet                | Fe1:-0.01, Fe2: 2.08         | 141.5                | 144.7                           |
| quintet                | Fe1: 0.18, Fe2: 3.71         | 58.7                 | 58.6                            |
| septet                 | Fe1: 3.76, Fe2: 2.17         | 36.6                 | 36.8                            |
| nonet                  | Fe1: 3.82, Fe2: 3.82         | 19.9                 | 19.0                            |
| singlet (open-shell)   | Fe1: 3.70, Fe2:-3.70         | 0                    | 0                               |

**Table S2.** Relative electronic energies of different spin states of **2** (each at optimised geometry) and Mulliken atomic spin densities at the Fe atoms.

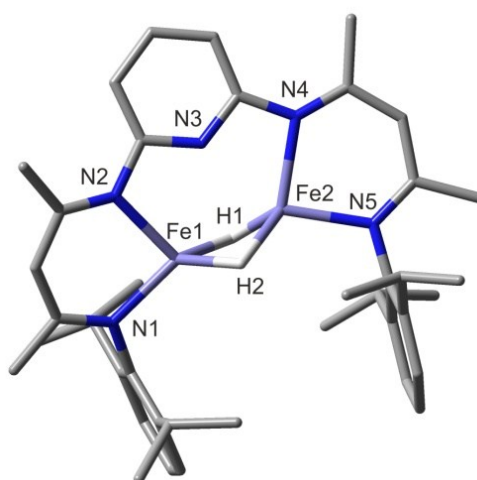

**Fig. S10.** Calculated molecular structure of  $[\text{Pyr})\text{Fe}_2(\mu\text{-H})_2]$  (**2**), B3LYP/Def2-SVP/Def2-TZVPD (open-shell singlet). Hydrogen atoms apart from H1, H2 have been omitted for clarity.

| <b>bond lengths /Å and angles /°</b> | <b>isolated molecule</b> | <b>molecule in Toluene (PCM)</b> |
|--------------------------------------|--------------------------|----------------------------------|
| Fe1-N1                               | 2.045                    | 2.053                            |
| Fe1-N2                               | 2.090                    | 2.098                            |
| Fe1-N3                               | 2.431                    | 2.420                            |
| Fe1-H1                               | 1.786                    | 1.796                            |
| Fe1-H2                               | 1.813                    | 1.821                            |
| Fe1...Fe2                            | 2.607                    | 2.626                            |
| Fe2-N5                               | 2.029                    | 2.033                            |
| Fe2-N4                               | 2.072                    | 2.076                            |
| Fe2-N3                               | 2.606                    | 2.642                            |
| Fe2-H1                               | 1.791                    | 1.794                            |
| Fe2-H2                               | 1.766                    | 1.772                            |
| N1-Fe1-N2                            | 90.3                     | 89.9                             |
| H1-Fe1-N1                            | 120.3                    | 120.2                            |
| H1-Fe1-N2                            | 133.5                    | 133.8                            |
| N1-Fe1-H2                            | 120.7                    | 121.2                            |
| N2-Fe1-H2                            | 116.7                    | 116.9                            |
| H1-Fe1-H2                            | 79.0                     | 78.9                             |
| Fe1-H1-Fe2                           | 93.6                     | 94.0                             |
| N4-Fe2-N5                            | 91.5                     | 91.4                             |
| H1-Fe2-N5                            | 124.4                    | 125.5                            |
| H1-Fe2-N4                            | 112.9                    | 112.3                            |
| N5-Fe2-H2                            | 125.5                    | 126.8                            |
| N4-Fe2-H2                            | 125.6                    | 123.5                            |
| H1-Fe2-H2                            | 80.1                     | 80.2                             |
| Fe1-H2-Fe2                           | 93.5                     | 93.9                             |

**Table S3.** Selected bond lengths /Å and angles /° of the open-shell singlet ground state of **2**.

Cartesian coordinates (Å) for the optimised theoretical structure of [P<sub>YR</sub>Fe<sub>2</sub>(μ-H)<sub>2</sub>] (**2**):

Open-shell singlet state (in toluene), E = -4318,48368571 hartree

|    | x         | y         | z         |
|----|-----------|-----------|-----------|
| Fe | -1.379984 | 0.814902  | 0.062246  |
| Fe | 1.232944  | 0.781801  | -0.201102 |
| N  | 3.107202  | 0.017757  | -0.391316 |
| N  | 1.908187  | 2.690149  | -0.659662 |
| N  | -0.265425 | 2.956400  | -0.112185 |
| N  | -2.388159 | 2.611205  | 0.461476  |
| N  | -3.139095 | -0.218013 | 0.289876  |
| C  | 4.133405  | 0.658172  | -0.931499 |
| C  | 4.076733  | 1.996697  | -1.405353 |
| C  | 5.467991  | -0.047168 | -1.065143 |
| C  | 3.064474  | 2.961478  | -1.276420 |
| C  | 3.258714  | -1.312518 | 0.121475  |
| C  | 3.352415  | 4.312333  | -1.902280 |
| C  | 3.618331  | -1.494484 | 1.482772  |
| C  | 2.976808  | -2.426927 | -0.710120 |
| C  | 0.896031  | 3.586877  | -0.329872 |
| C  | 3.694403  | -2.801572 | 1.984517  |
| C  | 3.901353  | -0.316335 | 2.414459  |
| C  | 3.069130  | -3.712429 | -0.155978 |
| C  | 2.568862  | -2.272948 | -2.174533 |
| C  | -1.392560 | 3.566709  | 0.297182  |
| C  | 0.977279  | 4.980260  | -0.114461 |
| C  | 3.425329  | -3.906181 | 1.177406  |
| C  | 2.805902  | -0.173299 | 3.487563  |
| C  | 5.294847  | -0.401460 | 3.062673  |
| C  | 3.558183  | -2.964750 | -3.130613 |
| C  | 1.135447  | -2.778562 | -2.417360 |
| C  | -1.383728 | 4.963391  | 0.501709  |
| C  | -0.179762 | 5.640809  | 0.295858  |
| C  | -3.666903 | 2.769539  | 0.821021  |
| C  | -4.307095 | 0.292825  | 0.645188  |
| C  | -3.016941 | -1.612507 | -0.019694 |
| C  | -4.534715 | 1.671338  | 0.914882  |
| C  | -4.264518 | 4.123449  | 1.138306  |
| C  | -5.515488 | -0.615444 | 0.765023  |
| C  | -3.227582 | -2.051431 | -1.353768 |
| C  | -2.616887 | -2.526407 | 0.989748  |
| C  | -3.033545 | -3.408410 | -1.648869 |
| C  | -3.642859 | -1.095867 | -2.472735 |
| C  | -2.439644 | -3.873004 | 0.638555  |
| C  | -2.377776 | -2.095640 | 2.436427  |
| C  | -2.644524 | -4.317797 | -0.666237 |
| C  | -2.520145 | -0.919824 | -3.512095 |
| C  | -4.953201 | -1.528063 | -3.155884 |
| C  | -3.359261 | -2.773559 | 3.411011  |
| C  | -0.923157 | -2.343934 | 2.873690  |
| H  | 4.976657  | 2.336819  | -1.916773 |
| H  | 6.203624  | 0.580684  | -1.582865 |

|   |           |           |           |
|---|-----------|-----------|-----------|
| H | 5.366796  | -0.995909 | -1.611571 |
| H | 5.870287  | -0.303631 | -0.072994 |
| H | 4.126766  | 4.212430  | -2.674207 |
| H | 3.726226  | 5.033459  | -1.157443 |
| H | 2.454221  | 4.745960  | -2.364161 |
| H | 3.968079  | -2.958029 | 3.031119  |
| H | 3.880987  | 0.600373  | 1.807950  |
| H | 2.854907  | -4.581222 | -0.783707 |
| H | 2.579654  | -1.199199 | -2.411314 |
| H | 1.908392  | 5.527507  | -0.220171 |
| H | 3.490189  | -4.916934 | 1.588504  |
| H | 2.778367  | -1.052519 | 4.152148  |
| H | 1.809847  | -0.067039 | 3.030925  |
| H | 2.990490  | 0.714832  | 4.114396  |
| H | 5.495639  | 0.501726  | 3.661810  |
| H | 6.091840  | -0.488772 | 2.307317  |
| H | 5.380138  | -1.268737 | 3.737478  |
| H | 3.569736  | -4.056989 | -2.982422 |
| H | 4.588086  | -2.600505 | -2.990599 |
| H | 3.274892  | -2.777014 | -4.179232 |
| H | 0.412947  | -2.265439 | -1.765858 |
| H | 1.051233  | -3.861037 | -2.227620 |
| H | 0.834484  | -2.598483 | -3.462432 |
| H | -2.257924 | 5.513552  | 0.828532  |
| H | -0.141980 | 6.718819  | 0.474291  |
| H | -5.554328 | 1.910589  | 1.213615  |
| H | -5.327510 | 4.027707  | 1.392087  |
| H | -4.181326 | 4.808751  | 0.280553  |
| H | -3.753944 | 4.595866  | 1.991871  |
| H | -6.390824 | -0.071761 | 1.141321  |
| H | -5.312432 | -1.462521 | 1.435602  |
| H | -5.773573 | -1.050805 | -0.212376 |
| H | -3.189826 | -3.761059 | -2.671629 |
| H | -3.821674 | -0.110151 | -2.019784 |
| H | -2.132906 | -4.588955 | 1.405379  |
| H | -2.554704 | -1.011825 | 2.493013  |
| H | -2.499488 | -5.371595 | -0.917831 |
| H | -2.299335 | -1.868519 | -4.028569 |
| H | -1.590161 | -0.570101 | -3.038773 |
| H | -2.813523 | -0.182828 | -4.277990 |
| H | -5.266055 | -0.775390 | -3.897950 |
| H | -5.773666 | -1.647481 | -2.430799 |
| H | -4.839089 | -2.486409 | -3.688164 |
| H | -3.214186 | -3.866093 | 3.436291  |
| H | -4.408630 | -2.584889 | 3.135611  |
| H | -3.207860 | -2.395757 | 4.435506  |
| H | -0.213673 | -1.832542 | 2.206946  |
| H | -0.676711 | -3.418196 | 2.873177  |
| H | -0.759167 | -1.965940 | 3.896288  |
| H | 0.072552  | 0.440337  | 1.093880  |
| H | -0.190551 | 0.307949  | -1.184772 |

Open-shell singlet state (isolated molecule), E = -4318,47725164 hartree

|    | x         | y         | z         |
|----|-----------|-----------|-----------|
| Fe | -1.353242 | 0.820412  | 0.084592  |
| Fe | 1.239235  | 0.796701  | -0.191172 |
| N  | 3.090159  | -0.008158 | -0.394767 |
| N  | 1.950812  | 2.685760  | -0.660044 |
| N  | -0.210260 | 2.959659  | -0.085906 |
| N  | -2.329130 | 2.618951  | 0.510798  |
| N  | -3.109543 | -0.199843 | 0.321060  |
| C  | 4.131851  | 0.608792  | -0.930514 |
| C  | 4.107719  | 1.950885  | -1.397404 |
| C  | 5.447661  | -0.130467 | -1.067313 |
| C  | 3.114900  | 2.935237  | -1.271144 |
| C  | 3.202800  | -1.344716 | 0.111246  |
| C  | 3.433292  | 4.281601  | -1.891730 |
| C  | 3.559041  | -1.543094 | 1.470936  |
| C  | 2.885613  | -2.445124 | -0.725600 |
| C  | 0.943383  | 3.591002  | -0.341295 |
| C  | 3.592085  | -2.853729 | 1.966999  |
| C  | 3.881973  | -0.377579 | 2.405557  |
| C  | 2.935860  | -3.734823 | -0.176510 |
| C  | 2.485404  | -2.270928 | -2.189855 |
| C  | -1.338253 | 3.573140  | 0.313208  |
| C  | 1.014123  | 4.991926  | -0.177092 |
| C  | 3.285543  | -3.945104 | 1.155696  |
| C  | 2.781041  | -0.185968 | 3.465373  |
| C  | 5.263367  | -0.521467 | 3.068842  |
| C  | 3.448731  | -2.998298 | -3.146047 |
| C  | 1.033179  | -2.717333 | -2.435683 |
| C  | -1.340789 | 4.977282  | 0.461442  |
| C  | -0.145677 | 5.656624  | 0.218116  |
| C  | -3.588983 | 2.776878  | 0.932847  |
| C  | -4.261215 | 0.312608  | 0.722192  |
| C  | -3.010369 | -1.585493 | -0.034158 |
| C  | -4.463150 | 1.685407  | 1.036962  |
| C  | -4.156762 | 4.125683  | 1.320749  |
| C  | -5.475865 | -0.586097 | 0.849430  |
| C  | -3.271963 | -1.981357 | -1.372326 |
| C  | -2.585034 | -2.531813 | 0.933513  |
| C  | -3.105608 | -3.330894 | -1.713026 |
| C  | -3.705840 | -0.985384 | -2.448061 |
| C  | -2.437825 | -3.869268 | 0.537292  |
| C  | -2.286087 | -2.145159 | 2.381442  |
| C  | -2.694906 | -4.272925 | -0.771167 |
| C  | -2.594876 | -0.764616 | -3.491680 |
| C  | -5.023113 | -1.394420 | -3.131508 |
| C  | -3.249956 | -2.825646 | 3.371629  |
| C  | -0.823606 | -2.437910 | 2.760437  |
| H  | 5.017388  | 2.273116  | -1.902984 |
| H  | 6.201767  | 0.482609  | -1.576337 |
| H  | 5.321792  | -1.070374 | -1.624079 |
| H  | 5.839235  | -0.409034 | -0.076839 |

|   |           |           |           |
|---|-----------|-----------|-----------|
| H | 4.232405  | 4.174796  | -2.636946 |
| H | 3.784907  | 5.003631  | -1.136875 |
| H | 2.553517  | 4.718205  | -2.385665 |
| H | 3.861504  | -3.023538 | 3.012541  |
| H | 3.907927  | 0.538914  | 1.798776  |
| H | 2.693142  | -4.593431 | -0.807756 |
| H | 2.539065  | -1.197795 | -2.423870 |
| H | 1.937524  | 5.544577  | -0.314041 |
| H | 3.317141  | -4.959012 | 1.562787  |
| H | 2.704297  | -1.064761 | 4.126660  |
| H | 1.796881  | -0.032570 | 2.996575  |
| H | 2.998531  | 0.691144  | 4.097175  |
| H | 5.497978  | 0.374276  | 3.666872  |
| H | 6.063762  | -0.647752 | 2.322526  |
| H | 5.304086  | -1.388493 | 3.748042  |
| H | 3.415817  | -4.090794 | -3.003284 |
| H | 4.492489  | -2.677644 | -3.001149 |
| H | 3.176894  | -2.794900 | -4.194782 |
| H | 0.331243  | -2.170263 | -1.789673 |
| H | 0.902161  | -3.794212 | -2.241164 |
| H | 0.743560  | -2.529442 | -3.482605 |
| H | -2.219757 | 5.532663  | 0.765511  |
| H | -0.117218 | 6.741520  | 0.351577  |
| H | -5.466326 | 1.926103  | 1.385917  |
| H | -5.187874 | 4.022045  | 1.680970  |
| H | -4.167402 | 4.817497  | 0.463845  |
| H | -3.562645 | 4.595077  | 2.119933  |
| H | -6.330977 | -0.047337 | 1.276290  |
| H | -5.260494 | -1.461726 | 1.478095  |
| H | -5.772261 | -0.979306 | -0.135129 |
| H | -3.300613 | -3.651357 | -2.739595 |
| H | -3.882379 | -0.018273 | -1.955706 |
| H | -2.112452 | -4.610601 | 1.271511  |
| H | -2.434401 | -1.059293 | 2.472124  |
| H | -2.572863 | -5.320572 | -1.058001 |
| H | -2.374243 | -1.693055 | -4.043829 |
| H | -1.661551 | -0.427341 | -3.015776 |
| H | -2.899574 | -0.001928 | -4.227433 |
| H | -5.349330 | -0.612450 | -3.836596 |
| H | -5.833223 | -1.549068 | -2.401278 |
| H | -4.913468 | -2.328320 | -3.706379 |
| H | -3.133527 | -3.921851 | 3.360764  |
| H | -4.303283 | -2.602846 | 3.140198  |
| H | -3.052545 | -2.482138 | 4.400372  |
| H | -0.125900 | -1.928644 | 2.080130  |
| H | -0.602771 | -3.517184 | 2.727988  |
| H | -0.614064 | -2.086845 | 3.784222  |
| H | 0.094121  | 0.419172  | 1.099421  |
| H | -0.184202 | 0.324591  | -1.170741 |

Nonet state (in Toluol), E = -4318,47645872 hartree

|    | x         | y         | z         |
|----|-----------|-----------|-----------|
| Fe | -1.378574 | 0.817195  | 0.044330  |
| Fe | 1.240383  | 0.786337  | -0.169071 |
| N  | 3.107095  | 0.007121  | -0.395790 |
| N  | 1.930963  | 2.686454  | -0.654148 |
| N  | -0.240376 | 2.956298  | -0.103168 |
| N  | -2.366379 | 2.620753  | 0.471057  |
| N  | -3.138453 | -0.202813 | 0.296696  |
| C  | 4.133019  | 0.636523  | -0.948435 |
| C  | 4.084773  | 1.975133  | -1.422271 |
| C  | 5.457990  | -0.083156 | -1.099273 |
| C  | 3.081224  | 2.947571  | -1.285288 |
| C  | 3.249849  | -1.325835 | 0.113083  |
| C  | 3.371421  | 4.294340  | -1.918249 |
| C  | 3.623188  | -1.514407 | 1.469892  |
| C  | 2.947114  | -2.435453 | -0.717961 |
| C  | 0.920690  | 3.586226  | -0.330790 |
| C  | 3.695510  | -2.823641 | 1.966659  |
| C  | 3.928625  | -0.342420 | 2.402351  |
| C  | 3.037106  | -3.723177 | -0.168695 |
| C  | 2.520658  | -2.274936 | -2.176456 |
| C  | -1.366820 | 3.570620  | 0.304041  |
| C  | 1.001806  | 4.980861  | -0.129670 |
| C  | 3.408985  | -3.923637 | 1.159419  |
| C  | 2.866376  | -0.212288 | 3.509843  |
| C  | 5.341479  | -0.428331 | 3.007592  |
| C  | 3.500066  | -2.959553 | -3.147988 |
| C  | 1.086208  | -2.784232 | -2.404934 |
| C  | -1.355318 | 4.968603  | 0.499329  |
| C  | -0.153053 | 5.644731  | 0.282155  |
| C  | -3.639717 | 2.785389  | 0.845605  |
| C  | -4.298402 | 0.313920  | 0.669636  |
| C  | -3.027332 | -1.597793 | -0.016760 |
| C  | -4.513785 | 1.692541  | 0.945680  |
| C  | -4.225693 | 4.141003  | 1.176921  |
| C  | -5.509936 | -0.587681 | 0.803951  |
| C  | -3.258637 | -2.033214 | -1.348571 |
| C  | -2.620414 | -2.515441 | 0.986688  |
| C  | -3.079750 | -3.391511 | -1.647155 |
| C  | -3.681789 | -1.074234 | -2.461624 |
| C  | -2.459130 | -3.863074 | 0.631839  |
| C  | -2.359290 | -2.089121 | 2.430968  |
| C  | -2.685417 | -4.304847 | -0.670418 |
| C  | -2.578616 | -0.919324 | -3.524917 |
| C  | -5.012741 | -1.488254 | -3.115828 |
| C  | -3.341315 | -2.752320 | 3.415262  |
| C  | -0.904717 | -2.361159 | 2.853747  |
| H  | 4.982394  | 2.306666  | -1.943123 |
| H  | 6.194932  | 0.538753  | -1.622214 |
| H  | 5.339869  | -1.027913 | -1.649044 |
| H  | 5.867861  | -0.349064 | -0.112892 |

|   |           |           |           |
|---|-----------|-----------|-----------|
| H | 4.144163  | 4.189253  | -2.690976 |
| H | 3.747513  | 5.017988  | -1.177052 |
| H | 2.473194  | 4.727535  | -2.380606 |
| H | 3.980620  | -2.985285 | 3.009421  |
| H | 3.886679  | 0.579124  | 1.804240  |
| H | 2.808131  | -4.588414 | -0.796094 |
| H | 2.524581  | -1.199985 | -2.407773 |
| H | 1.932037  | 5.527452  | -0.245884 |
| H | 3.471732  | -4.936137 | 1.566534  |
| H | 2.863904  | -1.095472 | 4.169714  |
| H | 1.856278  | -0.107440 | 3.084974  |
| H | 3.066537  | 0.672695  | 4.136320  |
| H | 5.556508  | 0.468811  | 3.610865  |
| H | 6.116167  | -0.503539 | 2.228198  |
| H | 5.449862  | -1.303261 | 3.669119  |
| H | 3.516878  | -4.052322 | -3.004037 |
| H | 4.530645  | -2.592814 | -3.020355 |
| H | 3.202502  | -2.768622 | -4.192054 |
| H | 0.370088  | -2.276938 | -1.742111 |
| H | 1.007954  | -3.868346 | -2.222035 |
| H | 0.772403  | -2.597850 | -3.445040 |
| H | -2.228157 | 5.521787  | 0.824256  |
| H | -0.114759 | 6.724142  | 0.451307  |
| H | -5.527986 | 1.937382  | 1.257778  |
| H | -5.283884 | 4.048594  | 1.450950  |
| H | -4.156860 | 4.827475  | 0.318837  |
| H | -3.696800 | 4.609658  | 2.021267  |
| H | -6.377038 | -0.039598 | 1.192626  |
| H | -5.302646 | -1.436811 | 1.470486  |
| H | -5.783101 | -1.020048 | -0.170567 |
| H | -3.252410 | -3.741930 | -2.668012 |
| H | -3.835398 | -0.084363 | -2.008385 |
| H | -2.148025 | -4.582280 | 1.393791  |
| H | -2.517725 | -1.002597 | 2.490026  |
| H | -2.552604 | -5.359602 | -0.924738 |
| H | -2.384968 | -1.872445 | -4.044166 |
| H | -1.633693 | -0.583716 | -3.071504 |
| H | -2.876233 | -0.179026 | -4.285986 |
| H | -5.328593 | -0.733949 | -3.854956 |
| H | -5.820316 | -1.591442 | -2.374011 |
| H | -4.924403 | -2.450712 | -3.645602 |
| H | -3.213475 | -3.847083 | 3.437516  |
| H | -4.390532 | -2.546547 | 3.151957  |
| H | -3.172567 | -2.378356 | 4.438432  |
| H | -0.194389 | -1.858332 | 2.181608  |
| H | -0.674956 | -3.439099 | 2.849687  |
| H | -0.725546 | -1.987084 | 3.875182  |
| H | 0.068863  | 0.445483  | 1.149898  |
| H | -0.177478 | 0.308553  | -1.231340 |



Nonet state (isolated molecule), E = -4318,46967991 hartree

|    | x         | y         | z         |
|----|-----------|-----------|-----------|
| Fe | -1.336318 | 0.821112  | 0.084044  |
| Fe | 1.256464  | 0.804171  | -0.157002 |
| N  | 3.090530  | -0.039064 | -0.390772 |
| N  | 2.011934  | 2.676582  | -0.644865 |
| N  | -0.140900 | 2.959760  | -0.058218 |
| N  | -2.266282 | 2.635178  | 0.541877  |
| N  | -3.104518 | -0.166637 | 0.338092  |
| C  | 4.145512  | 0.555863  | -0.923412 |
| C  | 4.153427  | 1.901370  | -1.381434 |
| C  | 5.443155  | -0.213472 | -1.067245 |
| C  | 3.181167  | 2.905219  | -1.253947 |
| C  | 3.169865  | -1.383173 | 0.101963  |
| C  | 3.529482  | 4.247071  | -1.867005 |
| C  | 3.525772  | -1.604734 | 1.458269  |
| C  | 2.821957  | -2.466213 | -0.745664 |
| C  | 1.008277  | 3.590193  | -0.343360 |
| C  | 3.532212  | -2.921609 | 1.938705  |
| C  | 3.879645  | -0.459055 | 2.406208  |
| C  | 2.846960  | -3.762945 | -0.211708 |
| C  | 2.418114  | -2.267234 | -2.205857 |
| C  | -1.270994 | 3.580043  | 0.324882  |
| C  | 1.070191  | 4.995712  | -0.228159 |
| C  | 3.199024  | -3.996408 | 1.116015  |
| C  | 2.804125  | -0.275014 | 3.493135  |
| C  | 5.273154  | -0.630067 | 3.037439  |
| C  | 3.375744  | -2.984795 | -3.175368 |
| C  | 0.963673  | -2.703922 | -2.455680 |
| C  | -1.280097 | 4.988379  | 0.425274  |
| C  | -0.091587 | 5.666534  | 0.151513  |
| C  | -3.507112 | 2.805590  | 1.013138  |
| C  | -4.236171 | 0.360506  | 0.774245  |
| C  | -3.038354 | -1.546352 | -0.047449 |
| C  | -4.399707 | 1.729644  | 1.123497  |
| C  | -4.033288 | 4.153327  | 1.459829  |
| C  | -5.466180 | -0.515277 | 0.909369  |
| C  | -3.330258 | -1.908800 | -1.388792 |
| C  | -2.615965 | -2.520335 | 0.893870  |
| C  | -3.200369 | -3.254726 | -1.758497 |
| C  | -3.759462 | -0.882978 | -2.437977 |
| C  | -2.505935 | -3.852456 | 0.468813  |
| C  | -2.282056 | -2.169594 | 2.343308  |
| C  | -2.795283 | -4.224095 | -0.842414 |
| C  | -2.670869 | -0.683451 | -3.509136 |
| C  | -5.107761 | -1.239267 | -3.090037 |
| C  | -3.246787 | -2.843583 | 3.337211  |
| C  | -0.821915 | -2.508737 | 2.691320  |
| H  | 5.071799  | 2.206215  | -1.881767 |
| H  | 6.210450  | 0.384664  | -1.574283 |
| H  | 5.293739  | -1.146625 | -1.629274 |
| H  | 5.829839  | -0.507151 | -0.079356 |

|   |           |           |           |
|---|-----------|-----------|-----------|
| H | 4.353985  | 4.134405  | -2.582849 |
| H | 3.856125  | 4.969595  | -1.101575 |
| H | 2.669923  | 4.685876  | -2.393896 |
| H | 3.801986  | -3.109429 | 2.981080  |
| H | 3.902689  | 0.467876  | 1.815245  |
| H | 2.581982  | -4.608526 | -0.851488 |
| H | 2.475169  | -1.190842 | -2.423338 |
| H | 1.986993  | 5.550805  | -0.393914 |
| H | 3.210776  | -5.015519 | 1.511005  |
| H | 2.733956  | -1.163299 | 4.142388  |
| H | 1.811807  | -0.104210 | 3.048322  |
| H | 3.044636  | 0.589552  | 4.133830  |
| H | 5.529312  | 0.250556  | 3.648941  |
| H | 6.057110  | -0.748826 | 2.272722  |
| H | 5.318181  | -1.511799 | 3.697188  |
| H | 3.339386  | -4.078964 | -3.046577 |
| H | 4.421232  | -2.669952 | -3.030639 |
| H | 3.100691  | -2.766491 | -4.220254 |
| H | 0.265817  | -2.163900 | -1.799625 |
| H | 0.828496  | -3.783592 | -2.280365 |
| H | 0.673166  | -2.496348 | -3.498569 |
| H | -2.163335 | 5.548996  | 0.706240  |
| H | -0.070122 | 6.755762  | 0.244134  |
| H | -5.385505 | 1.982628  | 1.511042  |
| H | -5.030281 | 4.049232  | 1.905748  |
| H | -4.116652 | 4.852647  | 0.612857  |
| H | -3.370568 | 4.613905  | 2.208157  |
| H | -6.300766 | 0.032400  | 1.364521  |
| H | -5.256431 | -1.407865 | 1.515575  |
| H | -5.790478 | -0.881766 | -0.076639 |
| H | -3.419703 | -3.550112 | -2.787666 |
| H | -3.890444 | 0.082081  | -1.927572 |
| H | -2.184015 | -4.615204 | 1.182288  |
| H | -2.398514 | -1.082075 | 2.457230  |
| H | -2.701987 | -5.268301 | -1.151725 |
| H | -2.497059 | -1.609931 | -4.080968 |
| H | -1.714417 | -0.383603 | -3.054578 |
| H | -2.970736 | 0.099917  | -4.224883 |
| H | -5.426200 | -0.438274 | -3.777095 |
| H | -5.903083 | -1.375896 | -2.340237 |
| H | -5.044526 | -2.169316 | -3.678011 |
| H | -3.160250 | -3.942078 | 3.302901  |
| H | -4.297707 | -2.588285 | 3.129671  |
| H | -3.021963 | -2.525985 | 4.368623  |
| H | -0.122184 | -2.003856 | 2.009962  |
| H | -0.630677 | -3.592674 | 2.634869  |
| H | -0.586554 | -2.183072 | 3.717804  |
| H | 0.106552  | 0.405260  | 1.161699  |
| H | -0.168618 | 0.336376  | -1.211958 |

## 7. References

- 1 J. Vela, J. M. Smith, Y. Yu, N. A. Ketterer, C. J. Flaschenriem, R. J. Lachicotte and P. L. Holland, *J. Am. Chem. Soc.*, 2005, **127**, 7857–7870.
- 2 (a) P. Dapporto, S. Midollini and L. Sacconi, *Inorg. Chem.*, 1975, **14**, 1643–1650; (b) Y. Ohki and H. Suzuki, *Angew. Chem. Int. Ed.*, 2000, **39**, 3120–3122; (c) Y. Ohki, T. Kojima, M. Oshima and H. Suzuki, *Organometallics*, 2001, **20**, 2654–2656; (d) M. V. Ovchinnikov, X. Wang, A. J. Schultz, I. A. Guzei and R. J. Angelici, *Organometallics*, 2002, **21**, 3292–3296.
- 3 S. V. Kryatov, S. Taktak, I. V. Korendovych, E. V. Rybak-Akimova, J. Kaizer, S. Torelli, X. Shan, S. Mandal, V. L. MacMurdo, A. i Payeras, *et al.*, *Inorg. Chem.*, 2005, **44**, 85–99 (and references cited in).
- 4 N. A. Eckert, S. Stoian, J. M. Smith, E. L. Bominaar, E. Münck and P. L. Holland, *J. Am Chem. Soc.*, 2005, **127**, 9344–9345.
- 5 M. J. Frisch, G. W. Trucks, H. B. Schlegel, G. E. Scuseria, M. A. Robb, J. R. Cheeseman, G. Scalmani, V. Barone, B. Mennucci, G. A. Petersson, H. Nakatsuji, M. Caricato, X. Li, H. P. Hratchian, A. F. Izmaylov, J. Bloino, G. Zheng, J. L. Sonnenberg, M. Hada, M. Ehara, K. Toyota, R. Fukuda, J. Hasegawa, M. Ishida, T. Nakajima, Y. Honda, O. Kitao, H. Nakai, T. Vreven, J. A. Montgomery, Jr., J. E. Peralta, F. Ogliaro, M. Bearpark, J. J. Heyd, E. Brothers, K. N. Kudin, V. N. Staroverov, R. Kobayashi, J. Normand, K. Raghavachari, A. Rendell, J. C. Burant, S. S. Iyengar, J. Tomasi, M. Cossi, N. Rega, J. M. Millam, M. Klene, J. E. Knox, J. B. Cross, V. Bakken, C. Adamo, J. Jaramillo, R. Gomperts, R. E. Stratmann, O. Yazyev, A. J. Austin, R. Cammi, C. Pomelli, J. W. Ochterski, R. L. Martin, K. Morokuma, V. G. Zakrzewski, G. A. Voth, P. Salvador, J. J. Dannenberg, S. Dapprich, A. D. Daniels, Ö. Farkas, J. B. Foresman, J. V. Ortiz, J. Cioslowski, and D. J. Fox, *Gaussian 09*, Revision C.01; Gaussian, Inc., Wallingford CT, 2010.
- 6 a) A. D. Becke, *Phys. Rev. A* 1988, **38**, 3098-3100; b) C. Lee, W. Yang, R. G. Parr, *Phys. Rev. B* 1988, **37**, 785-789; c) A. D Becke, *J. Chem. Phys.* 1993, **98**, 5648–5652.
- 7 a) D. Feller, *J. Comp. Chem.* 1996, **17(13)**, 1571-1586; b) K. L. Schuchardt, B. T. Didier, T. Elsethagen, L. Sun, V. Gurumoorthi, J. Chase, J. Li, T. L. Windus, *J. Chem. Inf. Model.* 2007, **47(3)**, 1045-1052.
- 8 D. Rappoport, F. Furche, *J. Chem. Phys.* 2010, **133**, 134105.
- 9 F. Weigend, R. Ahlrichs, *Phys. Chem. Chem. Phys.* 2005, **7**, 3297-3305.
